# Supplementary material for: NCX-DB: a unified resource for integrative analysis of the sodium calcium exchanger super-family
Source: PubMed Central journal article supplement (PMC5898058; doi:10.1186/s12868-018-0423-2), 2018-04-13
Supplement: 12868_2018_423_MOESM1_ESM.pdf [file 12868_2018_423_MOESM1_ESM.pdf]

## random\_peptide

```
#!/usr/bin/perl

use Modern::Perl;

#get peptide length and number of peptides from cmd-line
my $peptide_length = $ARGV[0];
my $num_peptides   = $ARGV[1];

#output file
my $outfileTxt = "random_peptides.txt";
open my $out, '>', $outfileTxt
  or die "Cannot open $outfileTxt: $!";

#array container for all peptides
my @random_proteins = makeRandomProteins( $peptide_length-1, $num_peptides-1 );

#loop through array and print each peptide on newline
while ( my $Element = shift(@random_proteins) ) {
    print $out $Element."\n";
}
#close FH;
close $out;

####SUBROUTINES
#####
sub makeRandomProteins {
    my $length = shift;
    my $number = shift;
    my $pep;
    my @result;

    foreach my $i ( 0 .. $number ) {
        $pep = RandomAA($length);
        push( @result, $pep );
    }
    return @result;
}

sub RandomAA {
    my $length = shift;
    my $pep;
    foreach my $i ( 0 .. $length ) {
        $pep .= randomAminoAcid();
    }
    return $pep;
}

sub randomAminoAcid {
```

```
                                random_peptide
my (@amino_acids) = qw( A C D E F G H I K L M N P Q R S T V W Y );
return randomResidue(@amino_acids);
}

sub randomResidue {
my @array = @_;
return $array[ rand @array ];
}
```
